# Supplementary material
Source: PubMed Central journal article supplement (PMC3840496)

## Supplementary Information

**Figure S1:** Comparison of the experimental data and fits for binding of soluble B2MG to a monoclonal IgG antibody immobilized on different sensor surfaces: (A) CM3 with 1350 RU anti-B2MG-biotin; (B) CM3 with 3200 RU anti-B2MG-biotin; (C) CM3 with 4100 RU anti-B2MG-biotin; (D) CM5 with 3000 RU anti-B2MG-biotin; (E) CM5 with 6000 RU anti-B2MG-biotin; (F) C1-SA with 1500 RU anti-B2MG-biotin; (G) CM3-SA with 800 RU anti-B2MG-biotin; (H) CM3-SA with 2600 RU anti-B2MG-biotin; (I) CM5-SA with 1000 RU anti-B2MG-biotin; (J) CM5-SA with 2000 RU anti-B2MG-biotin.

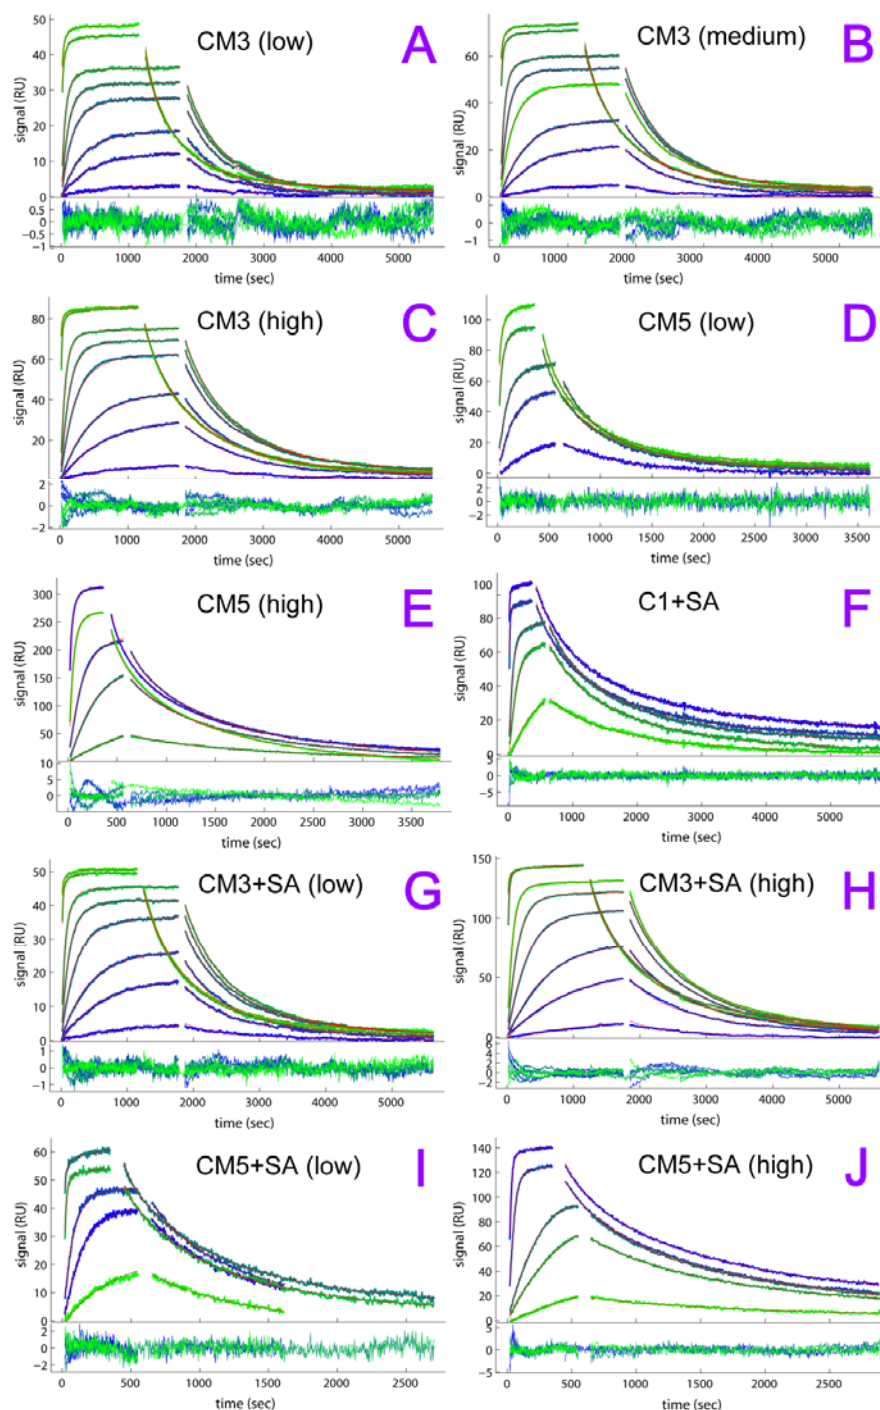

**Figure S2:** Affinity and rate constant distribution  $P(k_{off}, K_D)$  from the global fits of the families of traces shown in Figure S1.

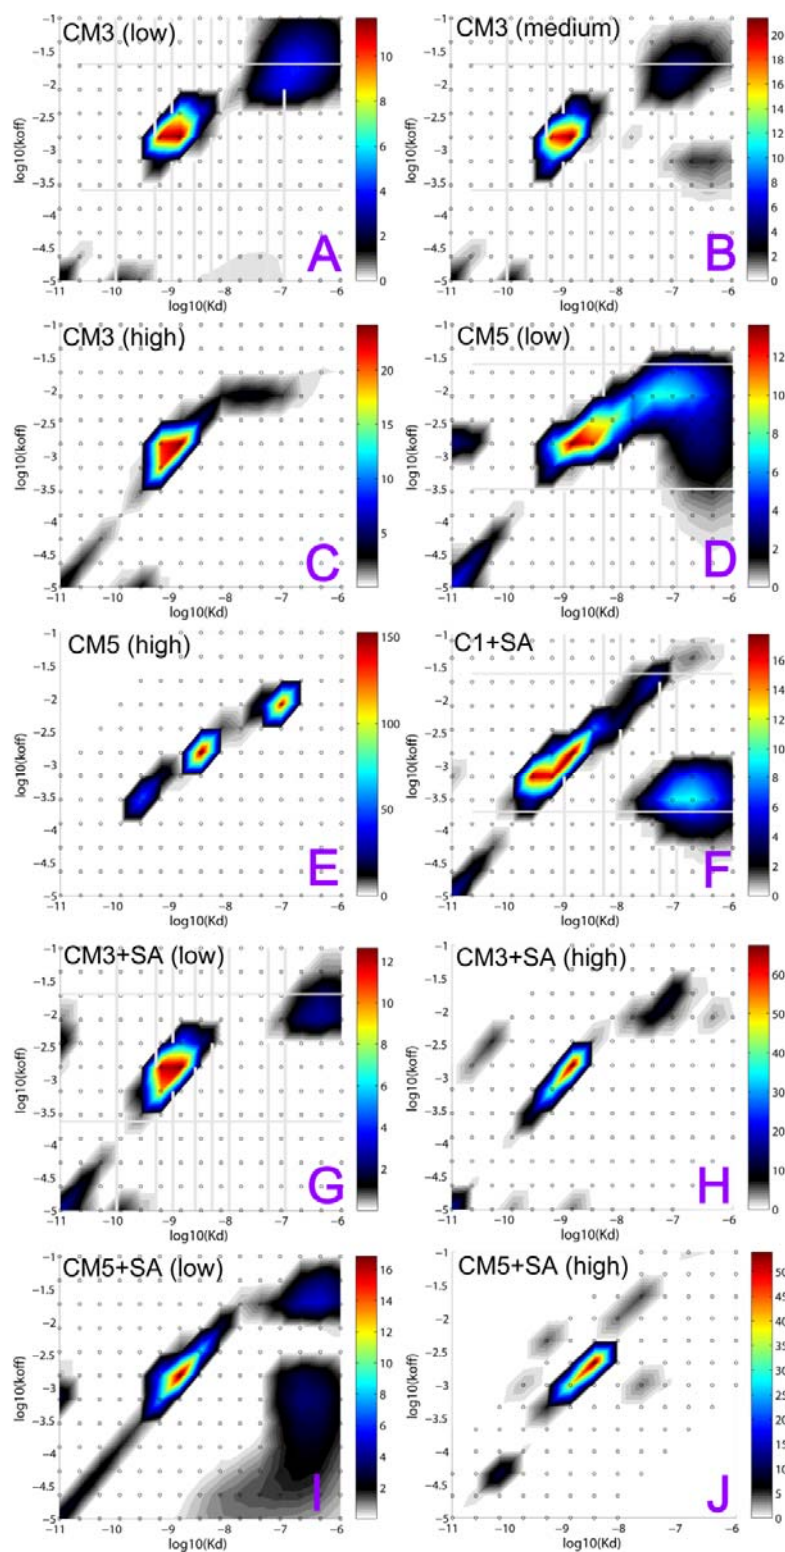

Supplement: NIHMS437610-supplement-01.pdf [file NIHMS437610-supplement-01.pdf]
